# Supplementary material for: Predictive Effect of Spatial Protein Signature in Advanced Non-small Cell Lung Cancer Patients Treated with Bispecific Antibody (KN046) Immunotherapy
Source: Research Square preprint supplement (doi:10.21203/rs.3.rs-1553755/v1), 2022-04-15
Supplement: Supplementary file 1 [file 9052364a49747afee397086d.docx]

**Table 1:** **Clinical characteristics**

**Table 2: Differential proteins in different areas and groups**

**Supplementary Table 1: List of 44 IO proteins detected by DSP**
